# Supplementary material for: Effect of Cosmetics Use on the In Vitro Skin Absorption of a Biocide, 1,2-Benzisothiazolin-3-one
Source: MDPI journal article supplement (doi:10.3390/toxics10030108), 2022-02-24
Supplement: s1 [file s1]

# Supplementary Materials: Effect of Cosmetics Use on the in Vitro Skin Absorption of a Biocide, 1,2-Benzisothiazolin-3-one

Yoonjung Huh <sup>1</sup>, Do-Hyeon Lee <sup>2</sup>, Dalwoong Choi <sup>2,\*</sup> and Kyung-Min Lim <sup>1,\*</sup>

**Table S1.** Formulation of cream pretreated at minipig skin.

| Phase | Ingredient                                                                                 | Weight (%) |
|-------|--------------------------------------------------------------------------------------------|------------|
| A     | Purified water                                                                             | to 100     |
|       | Disodium EDTA                                                                              | 0.02       |
|       | Glycerin                                                                                   | 5.00       |
|       | 1,2-Hexanediol                                                                             | 1.00       |
|       | Cetearyl Olivat, Sorbitan Olivat                                                           | 2.50       |
|       | Hydroxyacetophenone                                                                        | 0.50       |
|       | Trehalose                                                                                  | 0.50       |
| B     | Butylene Glycol                                                                            | 3.00       |
|       | Xanthan Gum                                                                                | 0.08       |
| C     | Caprylyl Methicone                                                                         | 2.00       |
|       | PPG-14 Butyl Ether                                                                         | 2.00       |
|       | Cetyl Ethylhexanoate                                                                       | 3.00       |
|       | Caprylic/Capric Triglyceride                                                               | 3.00       |
|       | Cetearyl Alcohol                                                                           | 0.30       |
|       | Glyceryl Stearate                                                                          | 1.00       |
|       | Sorbitan Stearate                                                                          | 0.50       |
|       | Shea Butter                                                                                | 2.00       |
| D     | Stearyl Dimethicone, Octadecane                                                            | 1.50       |
|       | Sodium Polyacryloyldimethyl Taurate, Hydrogenated Polydecene, Trideceth-10, Purified water | 0.30       |
|       | pH 6.0, Hardness, 29 (Sun rheo meter).                                                     |            |

**Table S2.** Formulation of lotion pretreated at minipig skin.

| Phase | Ingredient                                              | Weight (%) |
|-------|---------------------------------------------------------|------------|
| A     | Purified water                                          | to 100     |
|       | Glycerin                                                | 4.00       |
|       | 1,2-Hexanediol                                          | 1.00       |
|       | Hydroxyacetophenone                                     | 0.50       |
|       | Disodium EDTA                                           | 0.02       |
|       | Betaine                                                 | 0.50       |
|       | 1% Sodium Hyaluronate                                   | 2.00       |
| B     | Butylene Glycol                                         | 5.00       |
|       | Hydrogenated Lecithin                                   | 0.03       |
| C     | Purified water                                          | 6.86       |
|       | Carbomer                                                | 0.14       |
| D     | Caprylic/Capric Triglyceride                            | 1.00       |
|       | Butylene Glycol Dicaprylate/Dicaprate                   | 5.00       |
|       | Meadowfoam Seed oil                                     | 1.00       |
|       | PEG-100 Stearate, Glyceryl Stearate                     | 1.50       |
|       | Cetearyl Alcohol                                        | 0.50       |
|       | Arachidyl Alcohol, Behenyl Alcohol, Arachidyl Glucoside | 0.80       |
|       | Sorbitan Stearate                                       | 0.50       |
|       | Dimethicone                                             | 0.50       |
|       | Cyclopentasiloxane                                      | 4.00       |
|       | Tocopheryl Acetate                                      | 0.05       |
| E     | Purified water                                          | 2.00       |
|       | Tromethamine                                            | 0.11       |

pH 6.1, Viscosity, 30,000 (Brookfield, LVDV-E, LV 64 pin, 12 rpm).

**Table S3.** The formulations of essence pretreated at minipig skin.

| Phase                                                          | Ingredient                                    | Weight (%) |
|----------------------------------------------------------------|-----------------------------------------------|------------|
| A                                                              | Purified water                                | to 100     |
|                                                                | Butylene Glycol                               | 5.00       |
|                                                                | Panthenol                                     | 0.50       |
|                                                                | Allantoin                                     | 0.10       |
|                                                                | Niacinamide                                   | 2.00       |
|                                                                | Trehalose                                     | 0.50       |
|                                                                | Betaine                                       | 0.50       |
|                                                                | 1% Sodium Hyaluronate                         | 2.00       |
|                                                                | Hydroxyacetophenone                           | 0.50       |
|                                                                | 1,2-Hexanediol                                | 1.00       |
|                                                                | Glycerin                                      | 4.00       |
|                                                                | Xylitol                                       | 0.10       |
| B                                                              | Ammonium Acryloyldimethyltaurate/VP Copolymer | 0.40       |
| C                                                              | Dipropylene Glycol                            | 3.00       |
|                                                                | Sodium Polyacrylate                           | 0.01       |
| D                                                              | Polygonum Multiflorum Root Extract            | 4.00       |
|                                                                | Scutellaria Baicalensis Root Extract          | 2.00       |
| H 6.0, Viscosity 8,000 (Brookfied, LVDV-E, LV 64 pin, 12 rpm). |                                               |            |
